# Supplementary material for: Ultrathin FeFx nanolayers accelerating hole transfer for enhanced photoelectrochemical water oxidation
Source: Royal Society of Chemistry journal article supplement (doi:10.1039/c8ta07622g), 2018-01-01
Supplement: c8ta07622g1.pdf [file c8ta07622g1.pdf]

**Supporting information for**

**Ultrathin FeF<sub>x</sub> Nanolayers Accelerating Hole Transfer for Enhanced  
Photoelectrochemical Water Oxidation**

Chenchen Feng<sup>a,b</sup>, Lei Wang<sup>a</sup>, Shurong Fu<sup>a,b</sup>, Kai Fan<sup>a</sup>, Yajun Zhang<sup>a</sup> and Yingpu Bi<sup>\*a</sup>

<sup>a</sup>State Key Laboratory for Oxo Synthesis & Selective Oxidation, National Engineering Research Center for Fine Petrochemical Intermediates, Lanzhou Institute of Chemical Physics, CAS, Lanzhou, Gansu 730000, China. E-mail: yingpubi@licp.cas.cn

<sup>b</sup>University of Chinese Academy of Sciences, Beijing 100049, China.

## 1. Experimental section

### Preparation of Fe<sub>2</sub>O<sub>3</sub> and Fe<sub>2</sub>O<sub>3</sub>-Pt nanoflake photoanodes:

The hematite electrodes were prepared by a simple impregnation method and middle temperature annealing at 400 °C.<sup>1</sup> In this work, we used Fe foils (Alfa Aesar, 99.99%) that were cleaned under sonication by sequentially immersing in acetone, ethanol for 10 min. The treated Fe foils (1×1 cm<sup>2</sup>) were immersed in 5 mM H<sub>2</sub>PtCl<sub>6</sub> (Sigma-Aldrich, 99.9%) aqueous solutions for 1 min to precipitate a Pt nanoparticles layer on the surface of Fe foils. Then, the Pt/Fe or Fe foils were thermally annealed in the furnace (HF-Kejing Furnace, KSL-1100X) in air at 400 °C, with ramping rate of 10 °C min<sup>-1</sup>, kept at the desired temperature for 2h, and finally the samples were removed from the furnace. The samples were denoted Fe<sub>2</sub>O<sub>3</sub> and Fe<sub>2</sub>O<sub>3</sub>-Pt.

### Preparation of FeF<sub>x</sub>/Fe<sub>2</sub>O<sub>3</sub> and FeF<sub>x</sub>-Fe<sub>2</sub>O<sub>3</sub>-Pt nanoflake photoanodes:

For in situ preparation of FeF<sub>x</sub>/Fe<sub>2</sub>O<sub>3</sub> nanoflake, the Fe<sub>2</sub>O<sub>3</sub> or Fe<sub>2</sub>O<sub>3</sub>-Pt photoanodes were quickly dipped into a dilute hydrogen fluoride solution (0.02%, 0.1% and 0.5%), followed by rapid drying. Then, the samples were thermally annealed in the furnace (HF-Kejing Kurnace, KSL-1100X) in argon atmosphere at 250 °C for 4 h. The samples were denoted FeF<sub>x</sub>-Fe<sub>2</sub>O<sub>3</sub> and FeF<sub>x</sub>-Fe<sub>2</sub>O<sub>3</sub>-Pt.

### Preparation of FeOOH-Fe<sub>2</sub>O<sub>3</sub>-Pt nanoflake photoanodes:

The as-prepared photoanodes were immersed in the mixed precursor solution (45 mM urea and 30 mM FeCl<sub>3</sub>) and kept in the oven at 100 °C for 10 min. After the deposition, the coated photoanodes were rinsed with deionized water, dried in 60 °C.

### Preparation of pristine FeF<sub>3</sub> powders:

According to the previous reports,<sup>2</sup> 0.808 g Fe(NO<sub>3</sub>)<sub>3</sub>·9H<sub>2</sub>O was dissolved in 20 mL ethanol to result in a bright-orange solution of Fe<sup>3+</sup>. 7.5 mL of ethanol and 2.0 mL of HF aqueous solution (48 w.t. %) were added into a 15 mL plastic centrifuge tube. The centrifuge tube was then sealed carefully and the mixture of two liquids was shaken to mix with great caution. This gave rises to a clear HF/ethanol solution, to which 0.5 mL Fe<sup>3+</sup>/ethanol solution was quickly injected. The resulting colorless solution was shaken by hand and then heated in an oven at 60 °C for 24 h. The white cloudy precipitates that appeared over time were collected by centrifugation at a speed of 5000 rpm for 5 min, vigorously washed with ethanol twice and finally air dried at room temperature.

Finally, the FeF<sub>3</sub>-Fe<sub>2</sub>O<sub>3</sub>-Pt nanoflake photoanodes were prepared by dripping 10 μL FeF<sub>3</sub> ethanol solution (2 mg/mL). After drying at room temperature, the samples were thermally annealed in the furnace in argon atmosphere at 250 °C for 4 h. The samples were denoted FeF<sub>3</sub>-Fe<sub>2</sub>O<sub>3</sub>-Pt.

#### **Preparation of Fe<sub>2</sub>O<sub>3</sub>-Pt photoanodes with dilute hydrochloric acid and Hydrobromic acid solution treatment.**

At first, the dilute HCl and HBr aqueous solution have the same concentration with the above dilute HF aqueous solution. Similarly, the Fe<sub>2</sub>O<sub>3</sub>-Pt photoanodes were quickly dipped into the dilute hydrogen fluoride solution (0.1%), followed by rapid drying. Then, the samples were thermally annealed in the argon atmosphere at 250 °C for 4 h.

#### **Characterization.**

The X-ray diffraction spectra (XRD) measurements were performed on a Rigaku RINT-2000 instrument utilizing Cu K $\alpha$  radiation (40 KV). The XRD patterns were recorded from 10° to 90° with a scanning rate of 0.067°/s. Scanning electron microscopy (SEM) measurements were carried out on a field-emission scanning electron microscope (JSM-6701F, JEOL) operated at an accelerating voltage of 5 KV. Transmission electron microscopy (TEM) measurements were carried out by using a FEI Tecnai TF20 microscope operated at 200 kV. UV-vis diffuse reflectance spectra were taken on an UV-2550 (Shimadzu) spectrometer by using BaSO<sub>4</sub> as the reference. The element composition was detected by X-ray photoelectron spectroscopy (XPS, ESCALAB 250Xi).

#### **Photoelectrochemical measurements.**

The Photoelectrochemical properties were measured by an electrochemical analyzer (CHI660D) in a standard three-electrode system with the Fe<sub>2</sub>O<sub>3</sub>-based photoelectrodes (1×1 cm<sup>2</sup>) serving as the working electrode (photoanode), a Pt foil as the counter electrode, and a saturated Ag/AgCl (4 M KCl) as a reference electrode. The illumination source was a 300 W Xe arc lamp (Beijing Perfectlight Technology Co. Ltd., Microsolar 300 UV) equipped with an AM 1.5G filter, and the power intensity of the incident light was calibrated to 100 mW/cm<sup>2</sup> at the surface of the working electrode. The current-voltage (*J-V*) characteristic of the electrodes, with a scan rate of 10 mV/s. A 1.0 M KOH aqueous solution (pH 13.6) was used as the electrolyte. All potentials of the working electrode were presented against the reversible hydrogen electrode (RHE).

$$E_{RHE} = E_{Ag/AgCl} + E_{Ag/AgCl}(reference) + 0.0591 \times pH$$

$$(E_{Ag/AgCl}(reference) = 0.1976 \text{ V vs. NHE at } 25 \text{ }^\circ\text{C})$$

Where pH is a pH value of the electrolyte.

The incident photon to current efficiency (IPCE) was determined using a full solar simulator (Newport, Model 9600, 300W Xe arc lamp) and motorized monochromator (Oriel Cornerstone 130 1/8 m). IPCE was measured at 1.23 V vs. RHE in 1.0 M KOH aqueous solution (pH 13.6) using the same three-electrode setup described above for photocurrent measurements. IPCE was calculated as follows:

$$IPCE(\%) = \frac{1240 \times I(mA/cm^2)}{P_{light}(mW/cm^2) \times \lambda(nm)} \times 100\%$$

Where  $I$  is the measured photocurrent density at a specific wavelength,  $\lambda$  is the wavelength of incident light and  $P_{light}$  is the measured light power density at that wavelength.

Supposing 100% Faradaic Efficiency, the solar-to-hydrogen (STH) efficiency was calculated by following equation:

$$STH(\%) = \frac{I(mA/cm^2) \times (1.23 - V_{bias})(V)}{P_{light}(mW/cm^2)} \times 100\%$$

Where  $I$  is the photocurrent density from the C-V curve shown in Figure 3A,  $V_{bias}$  (vs. RHE) is the applied bias between WE and RHE,  $P_{light}$  is the incident illumination power density (100 mW cm<sup>-2</sup>).

The electrochemical impedance spectroscopy (EIS) Nyquist plots were measured in a 1.0 M KOH aqueous solution at 1.23 V (vs. RHE) with small AC amplitude of 10 mV in the frequency range of 0.1 to 10<sup>5</sup> Hz under AM 1.5G illumination (100 mW/cm<sup>2</sup>). The measured spectra were fitted with Z-view software.

#### **Detection of the amount of hydrogen and oxygen evolution:**

To quantitatively determine the amount of H<sub>2</sub> and O<sub>2</sub> produced from the overall water splitting, an online gas analysis system (Labsolar 6A, Beijing Perfectlight Technology Co. Ltd.) and a gas chromatograph (GC 7890A, Agilent Technologies) were employed. The produce of H<sub>2</sub> and O<sub>2</sub> was performed in a three-electrode system at a constant bias of 1.23 V vs. RHE under AM 1.5G illumination (100 mW cm<sup>-2</sup>).

The Faradaic efficiency was calculated by dividing the amount of gas detected by the theoretical amount of gas calculated on the basis of the total charge passed, using the following equation

$$FE(\%) = \frac{A \times n(\text{mol}) \times F(\text{C/mol})}{\text{Charge passed through WE(C)}} \times 100$$

where n is moles of evolved H<sub>2</sub> or O<sub>2</sub> gas, A is the number of electrons required to generate one H<sub>2</sub> or O<sub>2</sub> molecule (two for H<sub>2</sub>, four for O<sub>2</sub>) and F is the Faraday constant (96485.33 C mol<sup>-1</sup>).

## 2. Supplemental Figures and additional discussion

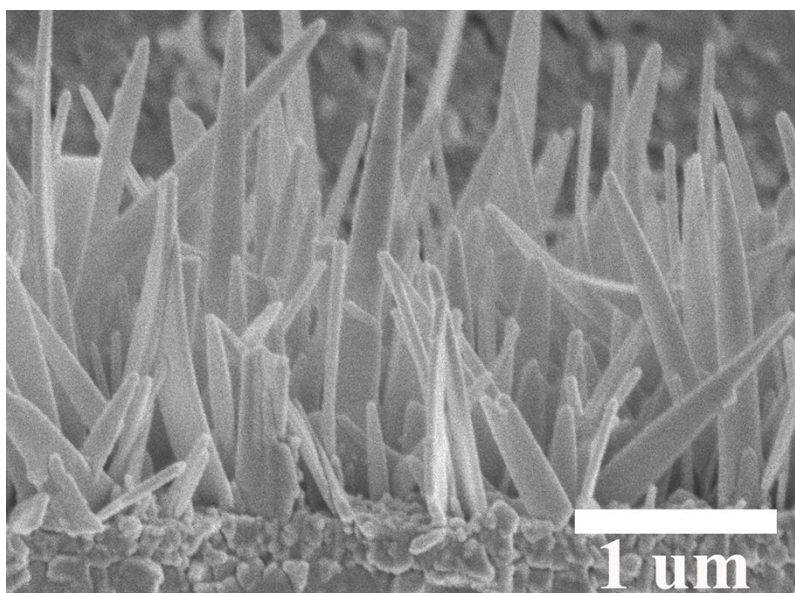

**Figure S1.** The side-view SEM image of the FeF<sub>x</sub>-Fe<sub>2</sub>O<sub>3</sub>-Pt photoanode.

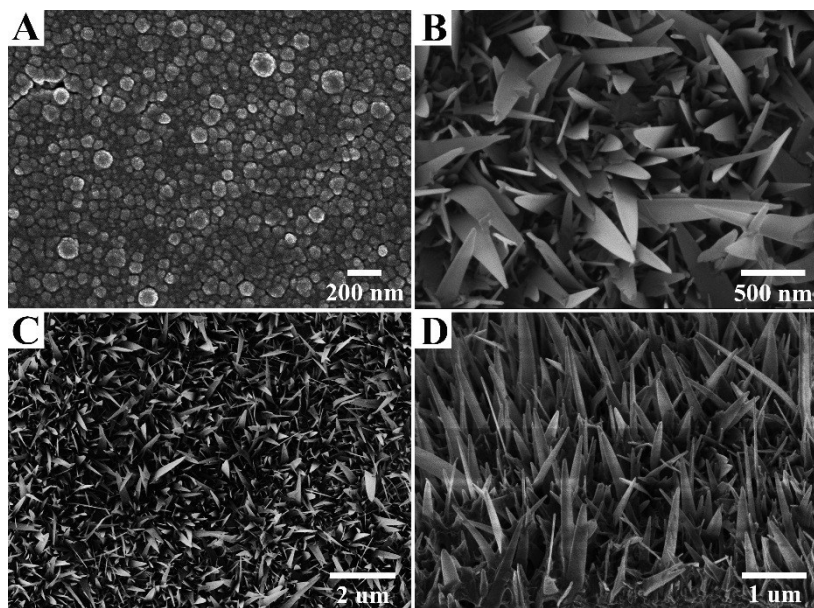

**Figure S2.** SEM images of Pt NPs layer (A), top (B, C) and side (D) view of Fe<sub>2</sub>O<sub>3</sub>-Pt photoanodes.

#### Additional discussion

Pt NPs were formed on the surface of Fe foils by a replacement reaction with H<sub>2</sub>PtCl<sub>6</sub> precursor. As shown in Figure S2A, the as-prepared Pt NPs possess an average size of 50-100 nm.

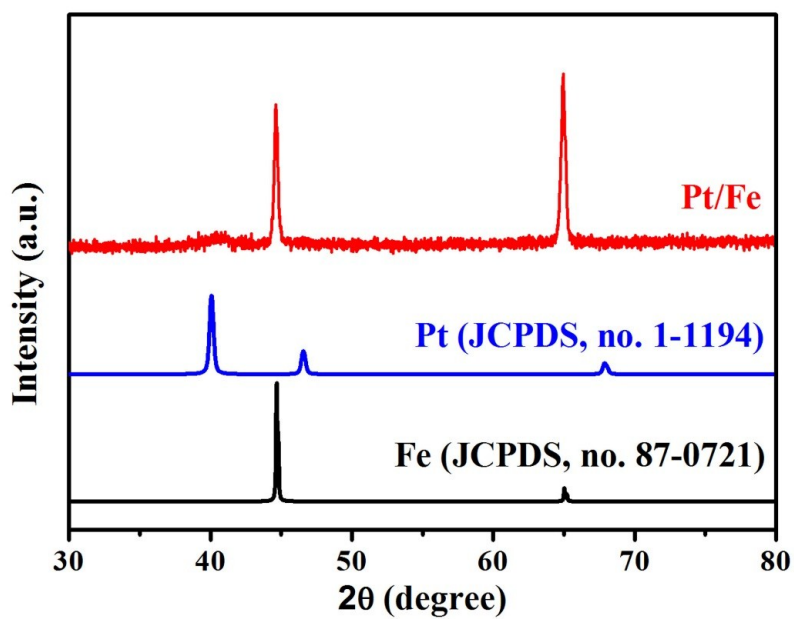

**Figure S3.** XRD pattern of Pt/Fe substrate.

### Additional discussion

To confirm the successful formation of Pt NPs on Fe substrate, XRD pattern of Pt/Fe sample was measured. In Figure S3, a weak diffraction peak at  $40^\circ$  could be indexed to the standard card (JCPDS, no. 1-1194) of Pt.<sup>3</sup> This result reveals the existence of Pt NPs on Fe substrate.

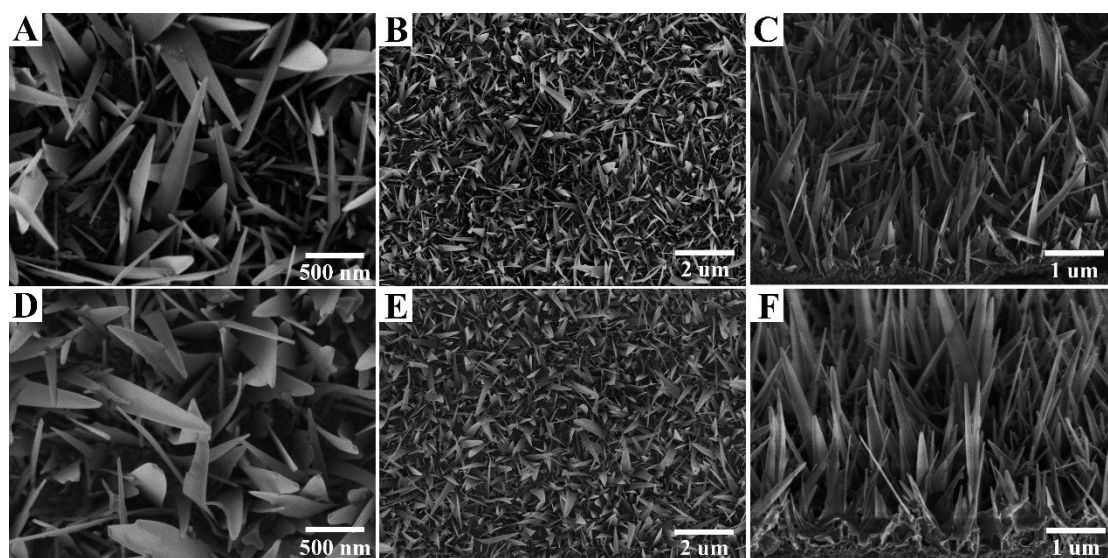

**Figure S4.** SEM images of top (A, B) and side (C) view for Fe<sub>2</sub>O<sub>3</sub> photoanodes, and top (D, E) and side (F) view for FeF<sub>x</sub>-Fe<sub>2</sub>O<sub>3</sub> photoanodes.

### Additional discussion

Figure S4 shows the SEM images of Fe<sub>2</sub>O<sub>3</sub> and FeF<sub>x</sub>-Fe<sub>2</sub>O<sub>3</sub> nanoflake arrays grown on Fe substrate. The deposition of Pt NPs and *in-situ* growth of FeF<sub>x</sub> ultrathin nanolayers have no evident damage on the flake-like structure.

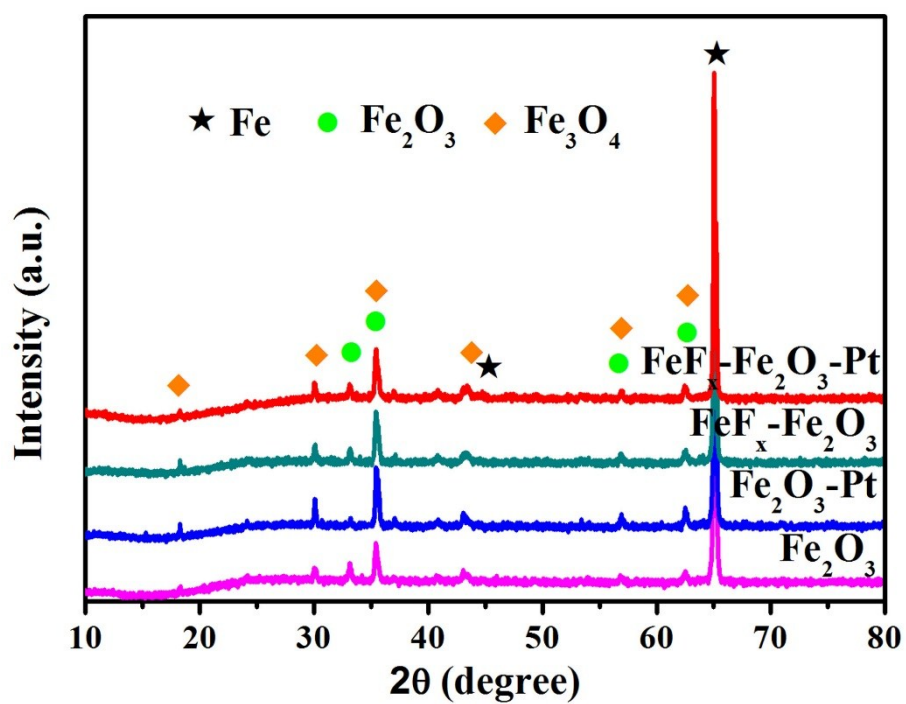

Figure S5. XRD pattern of  $\text{Fe}_2\text{O}_3$ ,  $\text{Fe}_2\text{O}_3\text{-Pt}$ ,  $\text{FeF}_x\text{-Fe}_2\text{O}_3$  and  $\text{FeF}_x\text{-Fe}_2\text{O}_3\text{-Pt}$  photoanodes.

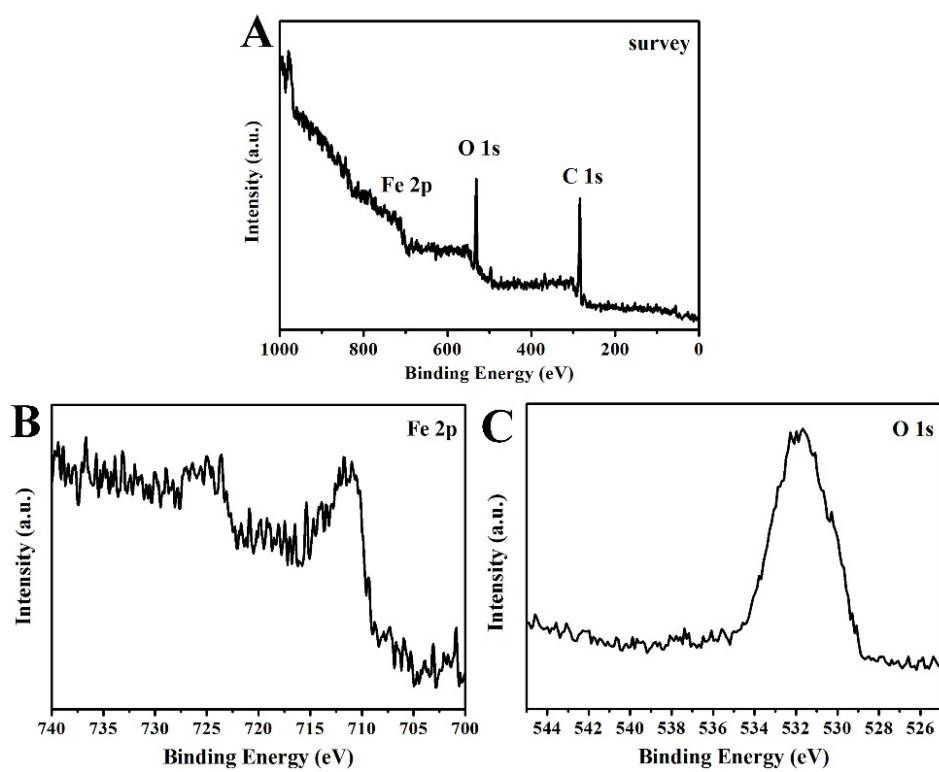

Figure S6. XPS spectra of  $\text{FeF}_x\text{-Fe}_2\text{O}_3\text{-Pt}$  photoanode.



### Additional discussion

Except for the XPS spectra of F1s (Figure 2B), the survey, Fe 2p and O 1s signals were showed in Figure S6. This result shows that the as-prepared sample only contains Fe, O and F elements without other impurities.

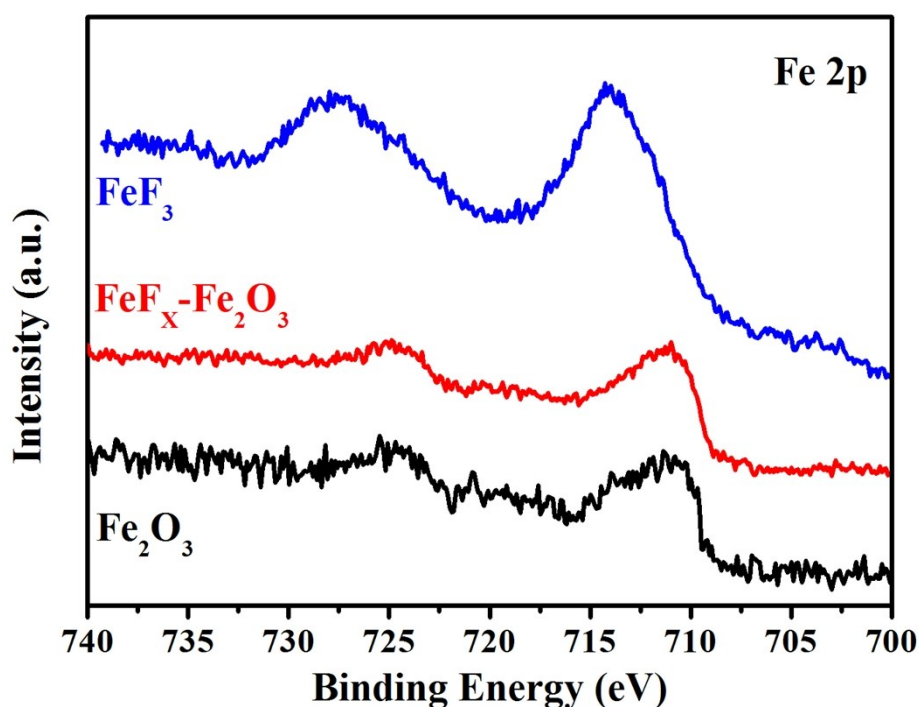

**Figure S7.** The Fe XPS spectra of FeF<sub>x</sub>-Fe<sub>2</sub>O<sub>3</sub>, Fe<sub>2</sub>O<sub>3</sub>, and FeF<sub>3</sub> samples.

### Additional discussion

The Fe XPS spectra of FeF<sub>x</sub>-Fe<sub>2</sub>O<sub>3</sub>, Fe<sub>2</sub>O<sub>3</sub>, and FeF<sub>3</sub> have been compared in Figure S7. It can be clearly seen that the binding energy (BE) of Fe 2p peaks in FeF<sub>3</sub> is much higher than that of both Fe<sub>2</sub>O<sub>3</sub> and FeF<sub>x</sub>-Fe<sub>2</sub>O<sub>3</sub> samples. However, no obvious change could be detected in Fe<sub>2</sub>O<sub>3</sub> and FeF<sub>x</sub>-Fe<sub>2</sub>O<sub>3</sub>, which may be resulted from the ultrathin thickness and very low amount of FeF<sub>x</sub> nanofilms formed on the Fe<sub>2</sub>O<sub>3</sub> nanoflakes after the fluorination process.

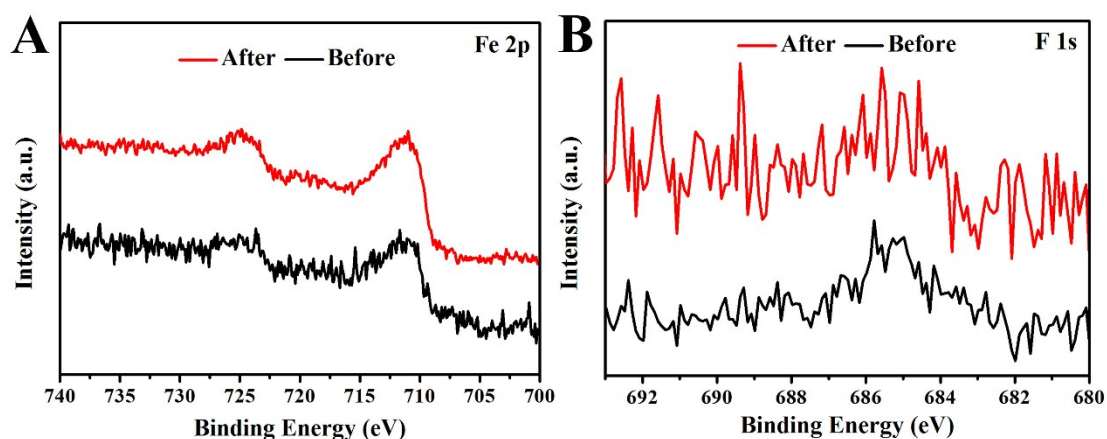

**Figure S8.** XPS spectra of Fe 2p and F 1s signal of  $\text{FeF}_x\text{-Fe}_2\text{O}_3$  before and after the PEC measurements.

### Additional discussion

After the PEC measurements, the chemical compositions of  $\text{FeF}_x$  ultrathin films have also been studied by XPS and compared with the fresh samples (Figure S8). It can be found that no evident changes of Fe 2p and F 1s peaks could be detected in  $\text{FeF}_x$  cocatalysts before and after the PEC measurements. Thereby, the  $\text{FeF}_x$  ultrathin films exhibit the relatively high chemical-stability during the PEC water splitting process, which may be due to their *in-situ* growth on the surfaces of  $\text{Fe}_2\text{O}_3$  nanoflakes.<sup>4</sup>

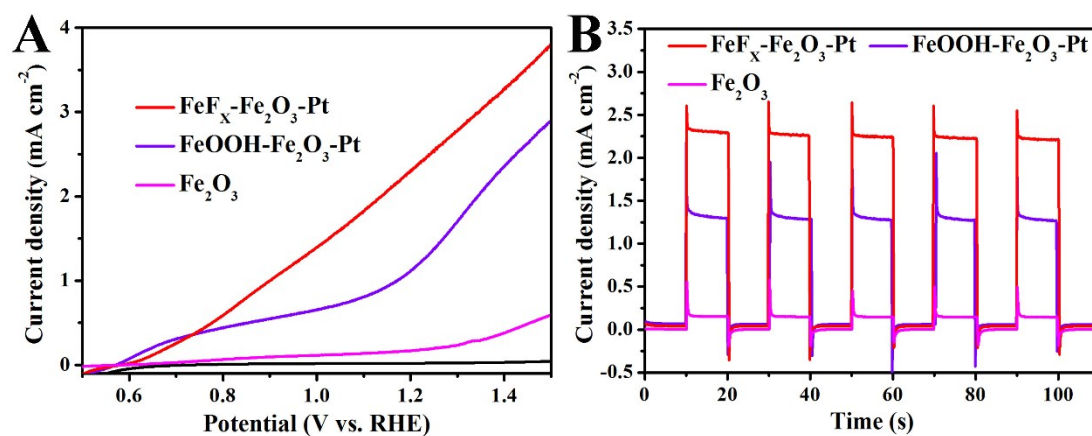

**Figure S9.** (A) J-V curves and (B) transient photocurrent responses under chopped illumination at 1.23  $V_{\text{RHE}}$ .

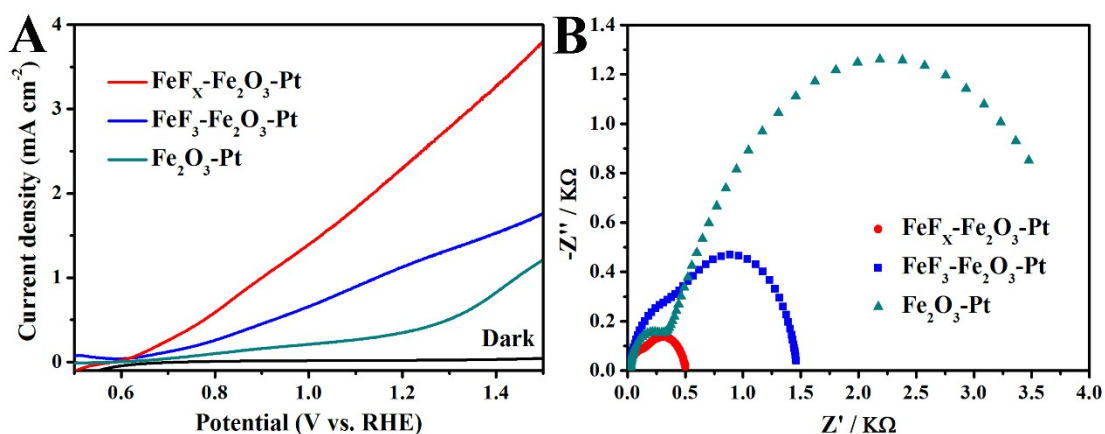

**Figure S10.** (A) J-V curves, and EIS Nyquist plots of Fe<sub>2</sub>O<sub>3</sub>-Pt, FeF<sub>3</sub>-Fe<sub>2</sub>O<sub>3</sub>-Pt and FeF<sub>x</sub>-Fe<sub>2</sub>O<sub>3</sub>-Pt photoanodes.

#### Additional discussion

To verify the merit of *in-situ* growth technology, the as-prepared FeF<sub>3</sub> ethanol solution was dropped on Fe<sub>2</sub>O<sub>3</sub>-Pt photoanodes. The photocurrent density of 1.2 mA cm<sup>-2</sup> at 1.23 V<sub>RHE</sub> can be obtained for the FeF<sub>3</sub>-Fe<sub>2</sub>O<sub>3</sub>-Pt photoanodes (Figure S10). This comparative result suggests that the elimination of hetero-junction between anode/OER cocatalyst are beneficial to the interfacial transfer of holes.

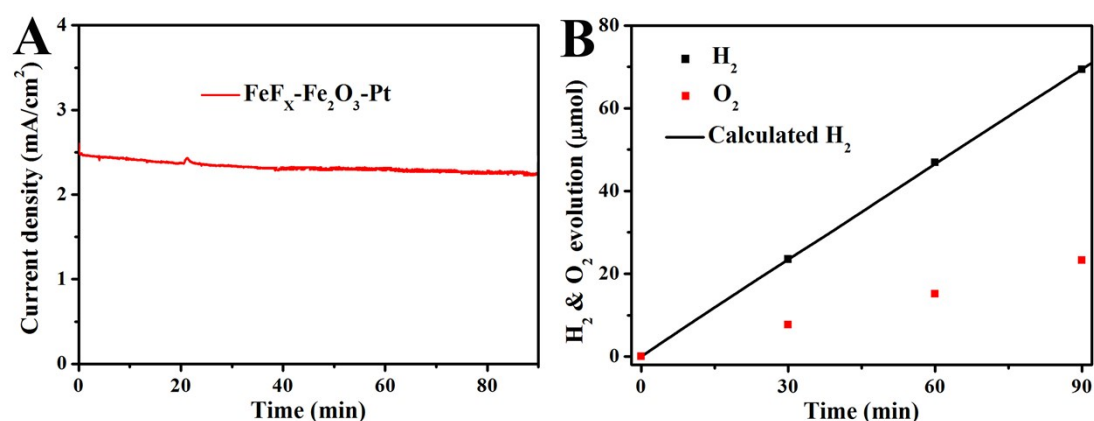

**Figure S11.** (A) photocurrent density versus time and (B) gas evolution from PEC water splitting of FeF<sub>x</sub>-Fe<sub>2</sub>O<sub>3</sub>-Pt photoanode at 1.23 V<sub>RHE</sub> under AM 1.5 G illumination in a 1.0 M KOH electrolyte.

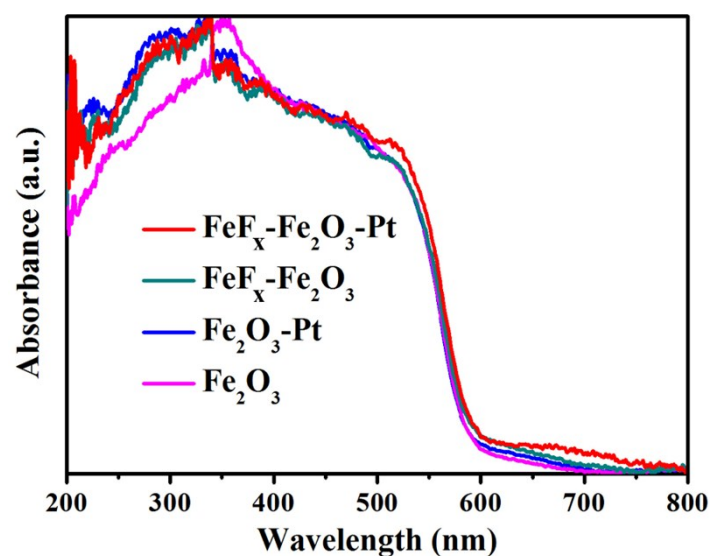

**Figure S12.** UV-vis spectra of  $\text{Fe}_2\text{O}_3$ ,  $\text{Fe}_2\text{O}_3\text{-Pt}$ ,  $\text{FeF}_x\text{-Fe}_2\text{O}_3$  and  $\text{FeF}_x\text{-Fe}_2\text{O}_3\text{-Pt}$  photoanodes.

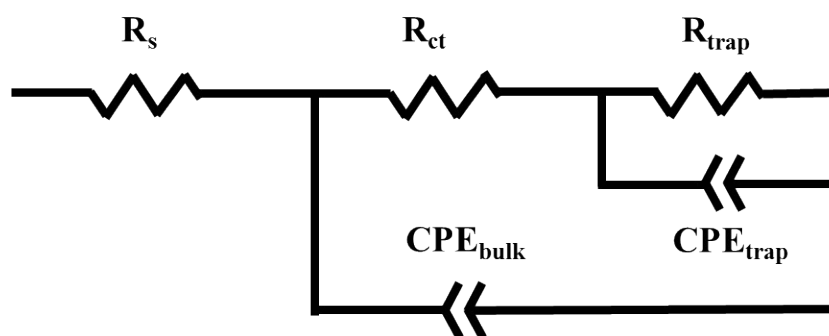

**Figure S13.** The equivalent circuit model used to fit the impedance data.

### Additional discussion

In the equivalent circuit model,  $R_s$  represents the series resistances in the electrochemical cell,  $R_{ct}$  is the resistances in the  $\text{Fe}_2\text{O}_3$ ,  $R_{trap}$  is the resistances at semiconductor/electrolyte interface,  $\text{CPE}_{bulk}$  represents the capacitance in the depletion layer of semiconductor, and  $\text{CPE}_{trap}$  is the capacitance at the surface of semiconductor.

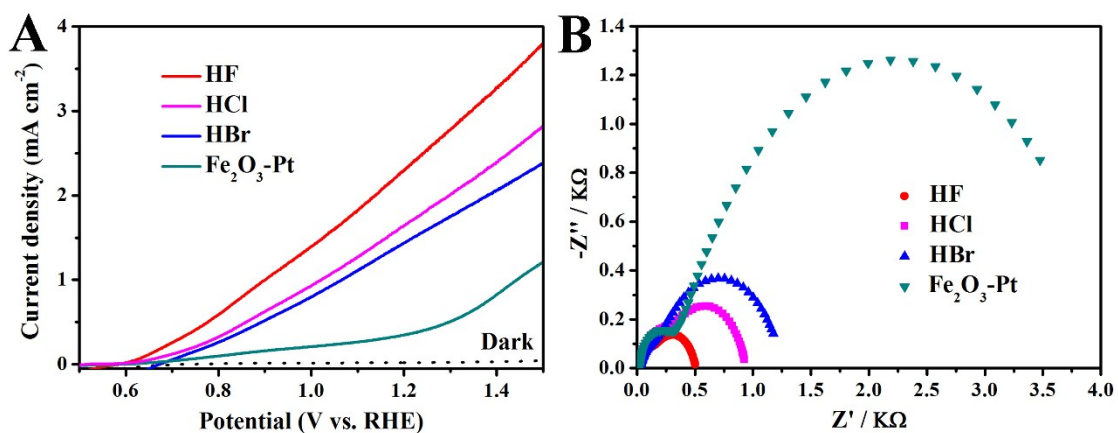

**Figure S14.** (A) J-V curves, and EIS Nyquist plots of Fe<sub>2</sub>O<sub>3</sub>-Pt photoanodes with/without dilute hydrogen fluoride, hydrochloric acid and Hydrobromic acid solution treatment.

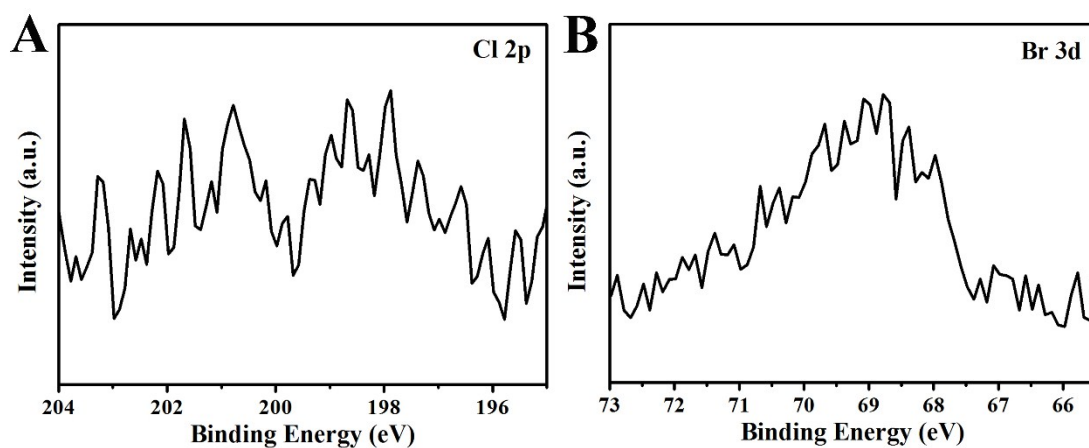

**Figure S15.** XPS spectra of Cl 2p and Br 3d signals of Fe<sub>2</sub>O<sub>3</sub>-Pt photoanodes with dilute hydrochloric acid and Hydrobromic acid solution treatment.

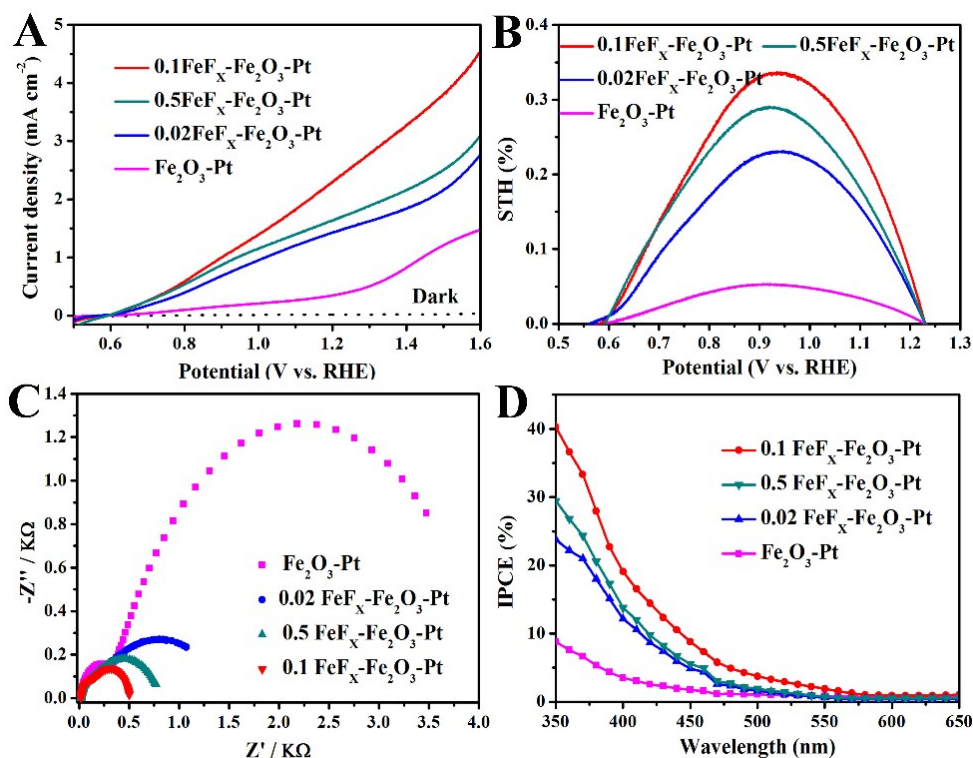

**Figure S16.** (A) J-V curves; (B) Photoconversion efficiency as a function of applied potential; (C) EIS Nyquist plots; (D) IPCE in the region 350-650 nm at a bias of 1.23 V<sub>RHE</sub> of Fe<sub>2</sub>O<sub>3</sub>-Pt, 0.02FeF<sub>x</sub>-Fe<sub>2</sub>O<sub>3</sub>-Pt, 0.1FeF<sub>x</sub>-Fe<sub>2</sub>O<sub>3</sub>-Pt and 0.5FeF<sub>x</sub>-Fe<sub>2</sub>O<sub>3</sub>-Pt photoanodes measured in 1 M KOH solution under AM 1.5 G illumination (100 mW cm<sup>-2</sup>).

### Additional discussion

To investigate the effect of the size and thickness of FeF<sub>x</sub> layer in PEC performance, we immersed the Fe<sub>2</sub>O<sub>3</sub> or Fe<sub>2</sub>O<sub>3</sub>-Pt photoanodes in the various solution. As shown in Figure S16, with increasing or decreasing the thickness of FeF<sub>x</sub> layer by adjusting the concentrations of HF solution, the PEC performances of as-obtained samples have been both decreased. In detail, when fluoride solution contains too few F<sup>-</sup>, the surface of nanoflakes would be partly fluoride, which directly effects the hole transfer on the surface of catalyst. In addition, with the excess F<sup>-</sup>, the nanoflake structure would suffer from corrosion, and then the light absorption capacity of photoanodes would be weakened.

**Table S1.** The fitting results using the equivalent model for EIS measurements

| Photoelectrodes                                      | R( $\Omega$ )  |                 |                   | CPE (F)               |                       |
|------------------------------------------------------|----------------|-----------------|-------------------|-----------------------|-----------------------|
|                                                      | R <sub>s</sub> | R <sub>ct</sub> | R <sub>trap</sub> | CPE <sub>bulk</sub>   | CPE <sub>trap</sub>   |
| FeF <sub>x</sub> -Fe <sub>2</sub> O <sub>3</sub> -Pt | 18.65          | 161.1           | 328.2             | 1.26×10 <sup>-5</sup> | 0.19×10 <sup>-3</sup> |
| Fe <sub>2</sub> O <sub>3</sub> -Pt                   | 18.96          | 337.4           | 2582              | 6.13×10 <sup>-6</sup> | 0.20×10 <sup>-5</sup> |
| Fe <sub>2</sub> O <sub>3</sub>                       | 18.5           | 446.8           | 9514              | 4.33×10 <sup>-6</sup> | 0.18×10 <sup>-3</sup> |

**Table S2.** Photocurrent densities and IPCE of recent hematite photoelectrodes in PEC water splitting.<sup>3-6</sup>

| Electrodes                                      | Electrolyte | Photocurrent density<br>(1.23 V <sub>RHE</sub> , AM 1.5G) | IPCE<br>(1.23 V <sub>RHE</sub> , 350 nm) | Reference |
|-------------------------------------------------|-------------|-----------------------------------------------------------|------------------------------------------|-----------|
| NiO/P-Fe <sub>2</sub> O <sub>3</sub>            | 1 M KOH     | 2.08 mA cm <sup>-2</sup>                                  | 38 %                                     | 5         |
| Sn-Fe <sub>2</sub> O <sub>3</sub>               | 1 M KOH     | 2.2 mA cm <sup>-2</sup>                                   | 27 %                                     | 6         |
| NiOOH/Sn, Zr-<br>Fe <sub>2</sub> O <sub>3</sub> | 1 M NaOH    | 1.64 mA cm <sup>-2</sup>                                  | 31 %                                     | 7         |
| Co-Pi/P-Fe <sub>2</sub> O <sub>3</sub>          | 1 M KOH     | 2.0 mA cm <sup>-2</sup>                                   | 25 %                                     | 8         |
| This work                                       | 1 M KOH     | 2.4 mA cm <sup>-2</sup>                                   | 41 %                                     |           |

### 3. Reference

- [1] L. Wang, Y. Yang, Y. Zhang, Q. Rui, B. Zhang, Z. Shen, Y. Bi, *J. Mater. Chem. A*, 2017, **5**, 17056.
- [2] L. Li, Y. Yu, F. Meng, Y. Tan, R. J. Hamers, S. Jin, *Nano Lett.* 2012, **12**, 724.
- [3] G. X. Lu and B. Tian, *J. Mol. Catal. (China)*, 2017, **31**, 101.
- [4] Y. J. Ou, S. P. Li and Y. P. Bi, *J. Mol. Catal. (China)*, 2015, **5**, 441.
- [5] Feng Li, Jing Li, Jie Zhang, Lili Gao, Xuefeng Long, Yiping Hu, Shuwen Li, Jun Jin and Jiantai Ma, *ChemSusChem*, 2018, **11**, 1.
- [6] M. Y. Li, Y. Yang, Y. C. Ling, W. T. Qiu, F. X. Wang, T. Y. Liu, Y. Song, X. X. Liu, P. P. Fang, Y. X. Tong and Y. Li, *Nano Lett.* 2017, **17**, 2490.
- [7] A. G. Tamirat, W. N. Su, A. A. Dubale, H. M. Chen and B. J. Hwang, *J. Mater. Chem. A*, 2015, **3**, 5949.
- [8] Z. B. Luo, C. C. Li, S. S. Liu, T. Wang and J. L. Gong, *Chem. Sci.*, 2017, **8**, 91.
